# Supplementary material
Source: publisher figshare collection journal article supplement (https://acs.figshare.com/ndownloader/files/22778867)
Supplement: Supplementary file 1 [file 22778867]

## **Synthesis of Double-Bridged Cofacial Nickel Porphyrin Dimers with 2,2'-Bipyridyl Pillars and Their Restricted Coordination Space**

*Akiharu Satake<sup>1)2)\*</sup>, Yuta Katagami<sup>1)</sup>, Yuki Odaka<sup>1)</sup>, Yusuke Kuramochi<sup>1)2)</sup>, Shohei Harada<sup>1)</sup>, Takaya Kouchi<sup>1)</sup>, Hajime Kamebuchi<sup>1)3)</sup>, and Makoto Tadokoro<sup>1)3)</sup>*

1) Graduate School of Science, Tokyo University of Science, 1-3 Kagurazaka, Shinjuku-ku, Tokyo 162-8601 (Japan)

2) Department of Chemistry, Faculty of Science Division II, Tokyo University of Science.

3) Department of Chemistry, Faculty of Science Division I, Tokyo University of Science.

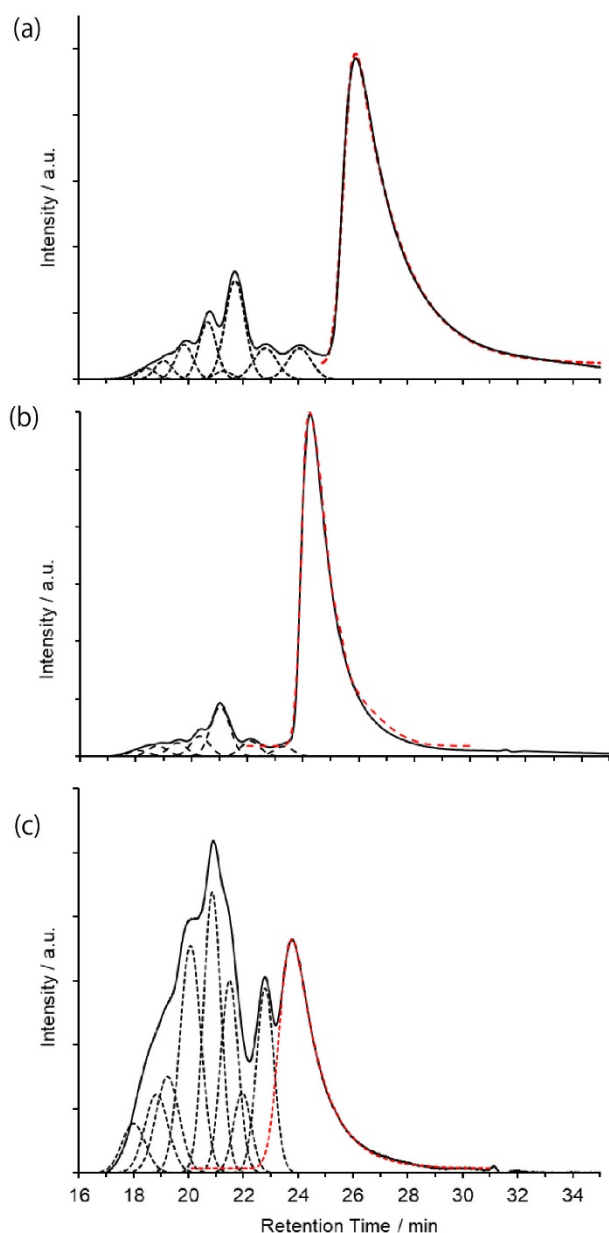

**Figure S1.** GPC charts (solid lines) of reaction mixtures from (a) **1<sub>Me</sub>**, (b) **1<sub>Bu</sub>**, and (c) **1<sub>OC</sub>**; GPC conditions: Tosoh G2500H<sub>HR</sub>×2 + G2000H<sub>HR</sub>×1 (columns), pyridine (eluent), 1.0 mL/min (flow rate), monitored at 536 nm in (a) and (b), and 563 nm in (c). Curve-fitting analyses show dotted lines, in which the red lines correspond to the cyclic porphyrin dimers.

**Table S1.** Crystal data and structure refinement

| Compound                                                    | <b>2<sub>Oc</sub></b>                                | <b>2<sub>Bu</sub></b>                                | <b>2<sub>Bu</sub>-(allylPd)<sub>2</sub></b>          |
|-------------------------------------------------------------|------------------------------------------------------|------------------------------------------------------|------------------------------------------------------|
| Temperature (K)                                             | 173                                                  | 173                                                  | 173                                                  |
| Crystal system                                              | <i>Triclinic</i>                                     | <i>Monoclinic</i>                                    | <i>Monoclinic</i>                                    |
| Space group                                                 | <i>P</i> -1(#2)                                      | <i>C</i> 2/c(#15)                                    | <i>P</i> 2 <sub>1</sub> /n(#14)                      |
| <i>a</i> (Å)                                                | 13.725(8)                                            | 20.464(8)                                            | 16.4955(5)                                           |
| <i>b</i> (Å)                                                | 14.935(8)                                            | 21.756(8)                                            | 16.5823(6)                                           |
| <i>c</i> (Å)                                                | 15.352(9)                                            | 27.647(10)                                           | 29.2556(9)                                           |
| $\alpha$ (deg)                                              | 92.577(7)                                            | 90                                                   | 90                                                   |
| $\beta$ (deg)                                               | 109.984(6)                                           | 98.453(4)                                            | 105.4930(10)                                         |
| $\gamma$ (deg)                                              | 99.780(7)                                            | 90                                                   | 90                                                   |
| <i>V</i> (Å <sup>3</sup> )                                  | 2896(3)                                              | 12175(8)                                             | 7711.6(4)                                            |
| <i>Z</i>                                                    | 1                                                    | 4                                                    | 2                                                    |
| <i>D</i> <sub>calc.</sub> (mg/m <sup>3</sup> )              | 1.225                                                | 1.259                                                | 1.377                                                |
| <i>F</i> <sub>000</sub>                                     | 1132                                                 | 4769                                                 | 3246                                                 |
| Theta range for data collection (< 2 $\theta$ )             | 3.220 to 55.118°                                     | 2.748 to 50.052°                                     | 4.912 to 50.052°                                     |
| Reflections collected                                       | 15010                                                | 26227                                                | 83582                                                |
| Independent reflections                                     | 12036<br>[R(int) = 0.0311]                           | 10653<br>[R(int) = 0.0743]                           | 13588<br>[R(int) = 0.0744]                           |
| Final <i>R</i> indices [ <i>I</i> >2 $\sigma$ ( <i>I</i> )] | R <sub>1</sub> = 0.0729,<br>wR <sub>2</sub> = 0.1988 | R <sub>1</sub> = 0.0799,<br>wR <sub>2</sub> = 0.2274 | R <sub>1</sub> = 0.0543,<br>wR <sub>2</sub> = 0.1393 |
| <i>R</i> indices (all data)                                 | R <sub>1</sub> = 0.1216,<br>wR <sub>2</sub> = 0.2156 | R <sub>1</sub> = 0.1471,<br>wR <sub>2</sub> = 0.2820 | R <sub>1</sub> = 0.0697,<br>wR <sub>2</sub> = 0.1546 |
| Goodness-of-fit                                             | 1.105                                                | 1.008                                                | 1.031                                                |

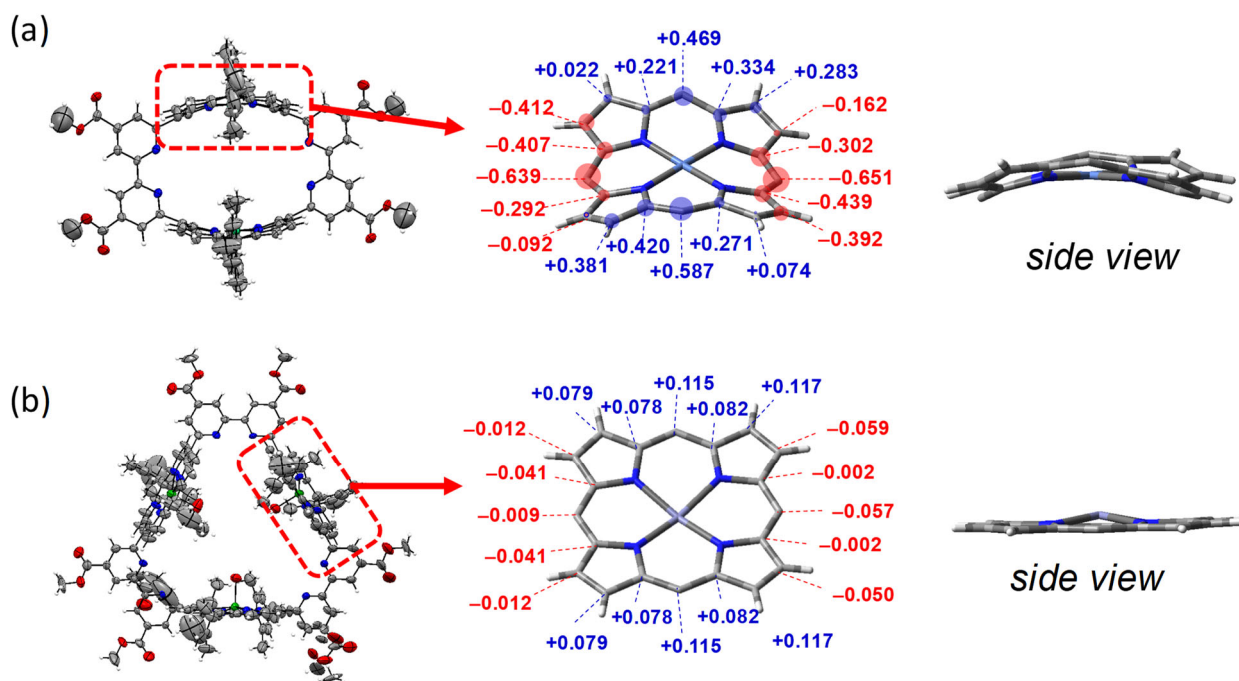

**Figure S2.** Crystal structures of (a) cyclic dimer of Ni(II) porphyrin **2Oc** and (b) cyclic trimer of Zn(II) porphyrin **Zn-3Me**. ORTEP views (left), the deviations of selected atoms (in Å) from the 4N mean planes (center), and side views of the porphyrin parts (right).

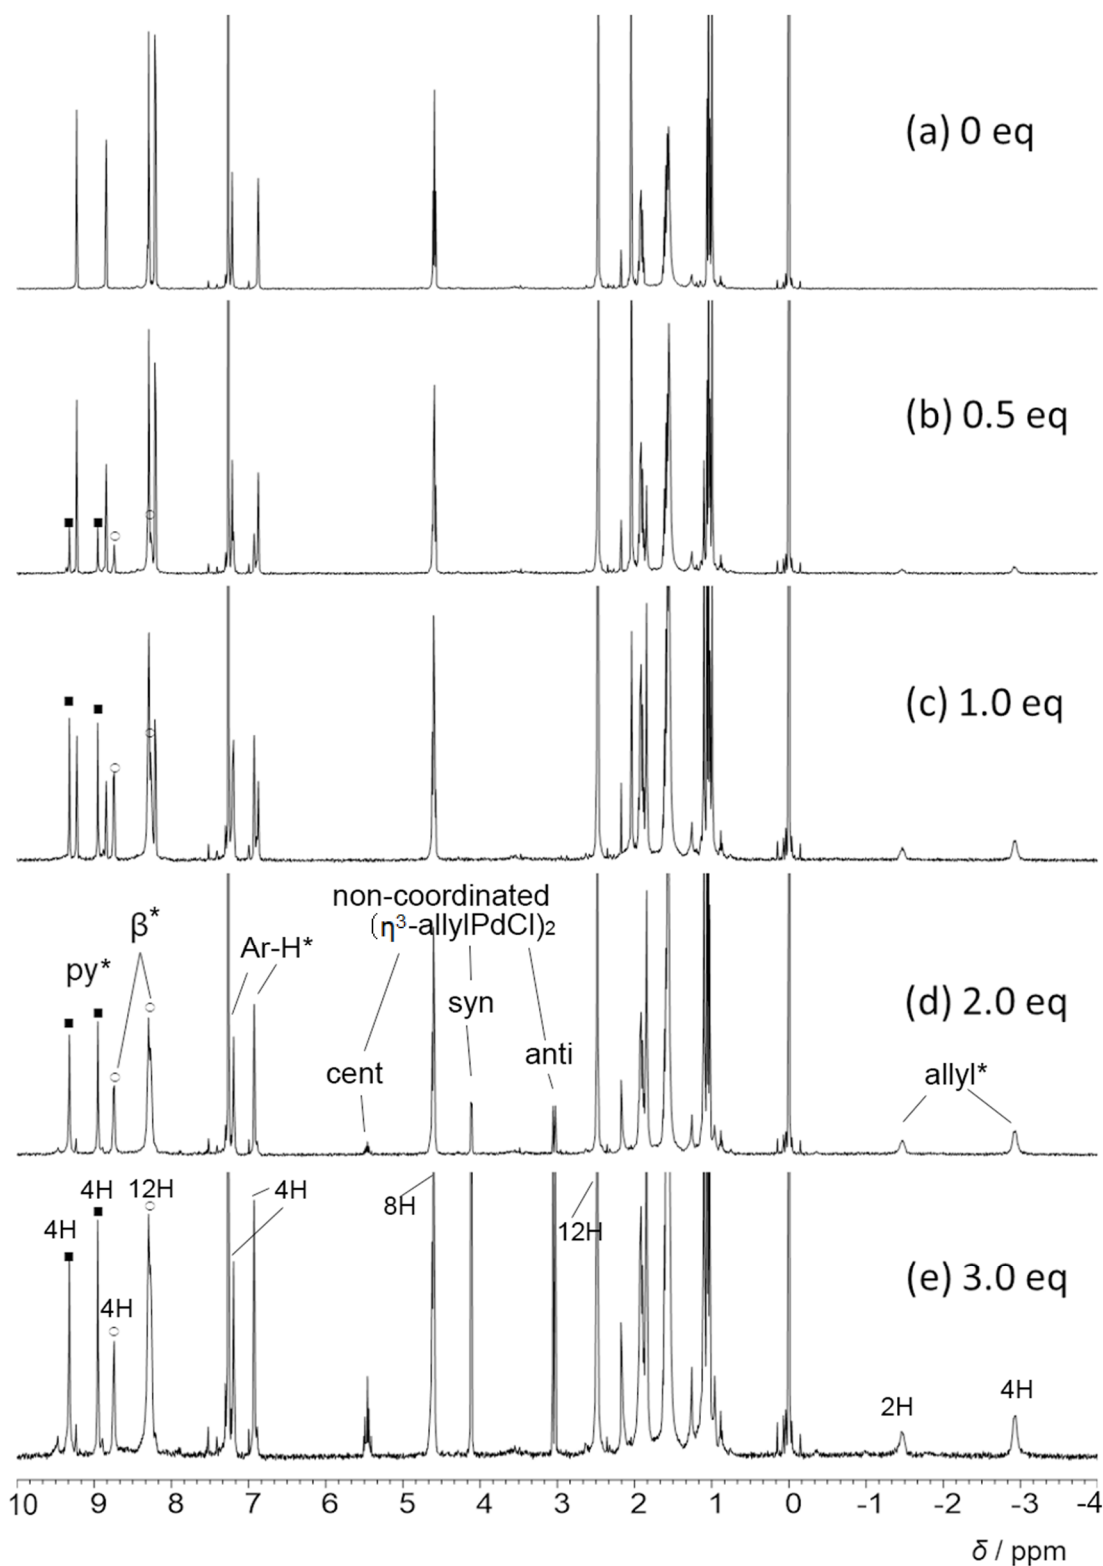

**Figure S3.**  $^1\text{H}$  NMR (400 MHz) titration of cationic  $\eta^3$ -allylpalladium tetrakis(pentafluorophenyl)borate complexes into **2<sub>Bu</sub>** in  $\text{CDCl}_3$  at 24 °C. (Enlargement between 10.0 and 6.5 ppm. See Figure 6.) From the top to the bottom: 0, 0.5, 1.0, 2.0, and 3.0 equiv. of the palladium species.

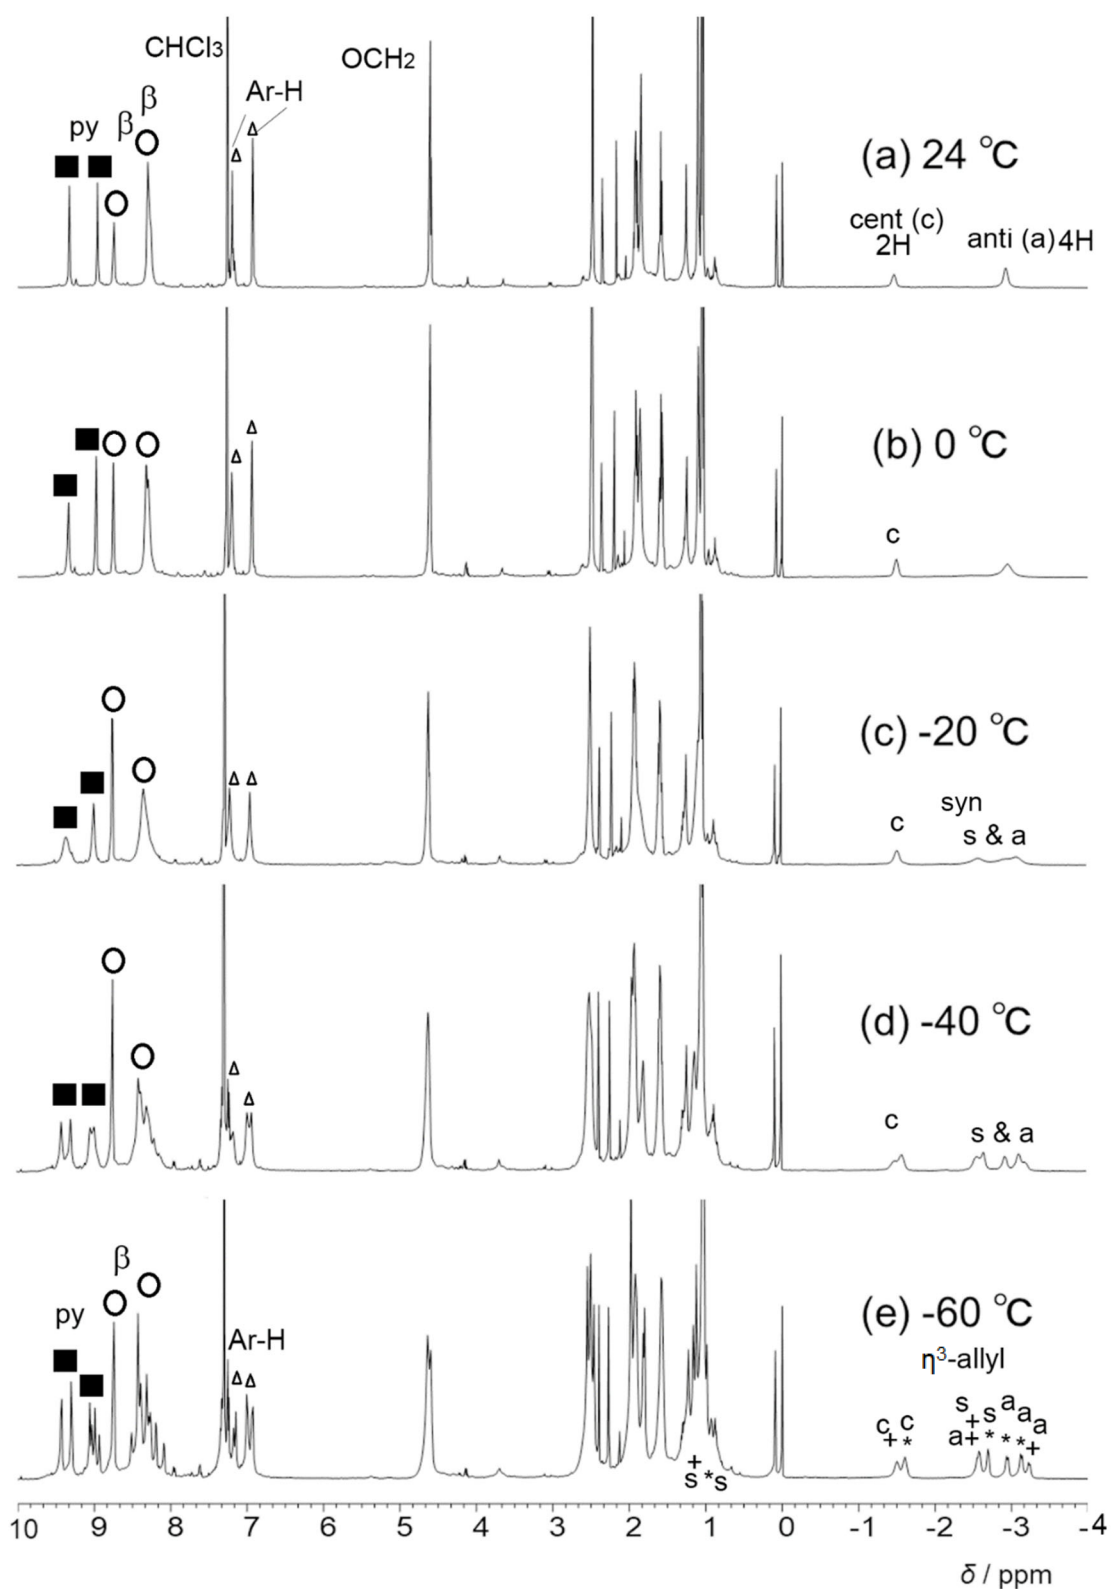

**Figure S4.** VT- $^1\text{H}$  NMR spectra (400 MHz,  $\text{CDCl}_3$ ) of a 2:1 mixture of cationic  $\eta^3$ -allylpalladium complexes and **2Bu**. (a) 24 °C, (b) 0 °C, (c) -20 °C, (d) -40 °C, (e) -60 °C

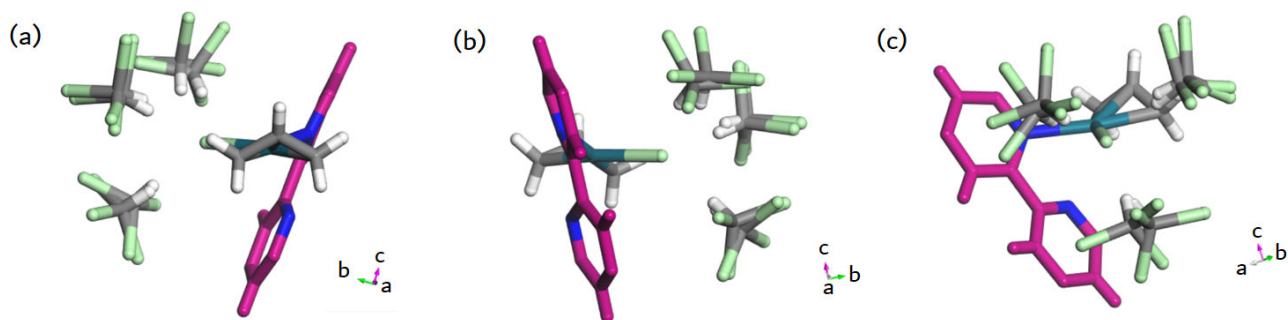

**Figure S5.** A  $\eta^3$ -allyl palladium chloride moiety in the molecular structure of **2<sub>Bu</sub>-(allylPd)<sub>2</sub>** obtained by the XRD analysis. Purple colored atoms correspond to the 2,2'-bipyridyl part. The  $\eta^3$ -allyl palladium chloride and  $\text{CHCl}_3$  molecules are shown as light green (chlorine), green (palladium), blue (nitrogen), gray (carbon), and white (hydrogen atoms). (a) a front view of the  $\eta^3$ -allyl group, (b) (c) from other angles.

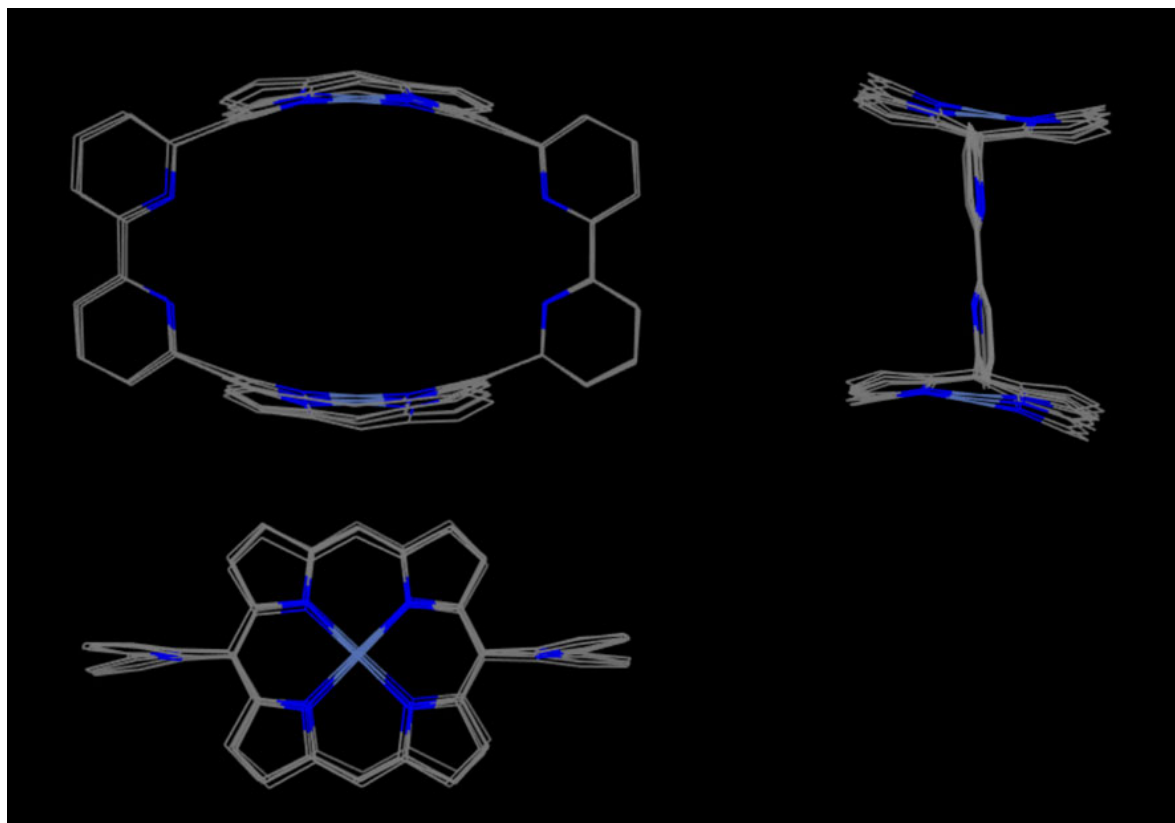

**Figure S6.** Macrocyclic frameworks composed of two porphyrin and two bipyridyl groups in **2<sub>Oc</sub>**, **2<sub>Bu</sub>**, **2<sub>Bu</sub>-(allylPd)<sub>2</sub>** (overlaid).

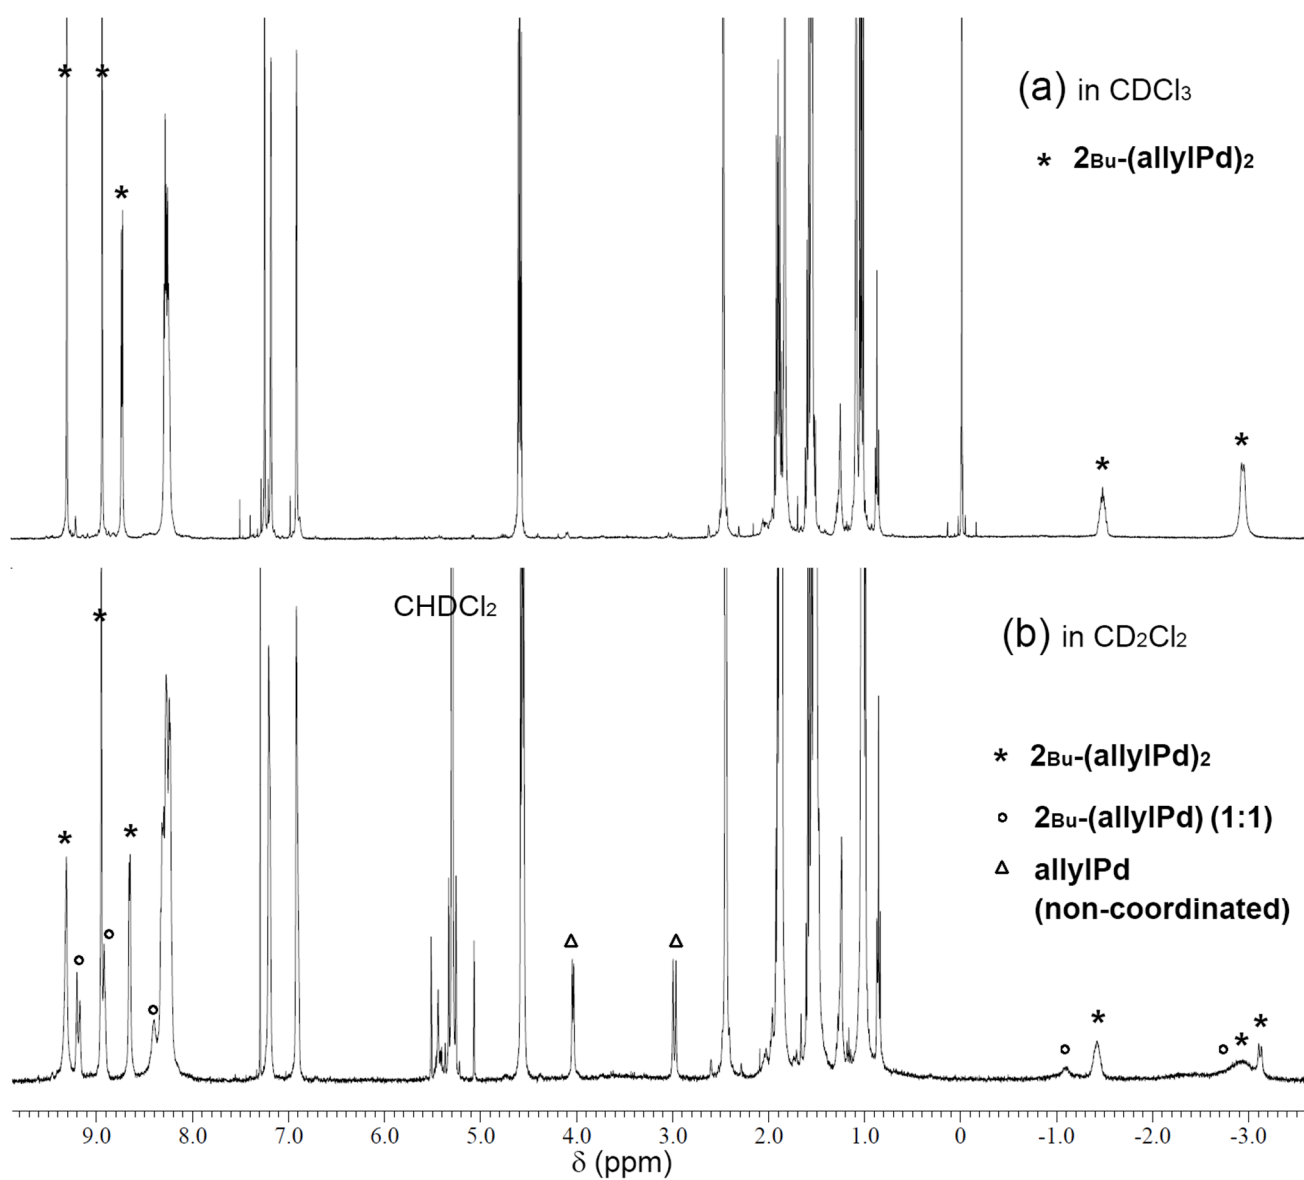

**Figure S7.**  $^1\text{H}$  NMR spectra (400 MHz, at rt) of  $2_{\text{Bu}}-(\text{allylPd})_2$  (purified by recrystallization) in (a)  $\text{CDCl}_3$  and (b)  $\text{CD}_2\text{Cl}_2$ . In (b),  $2_{\text{Bu}}-(\text{allylPd})_2 : 2_{\text{Bu}}-(\text{allylPd})$  (1:1 complex) = 71:29.



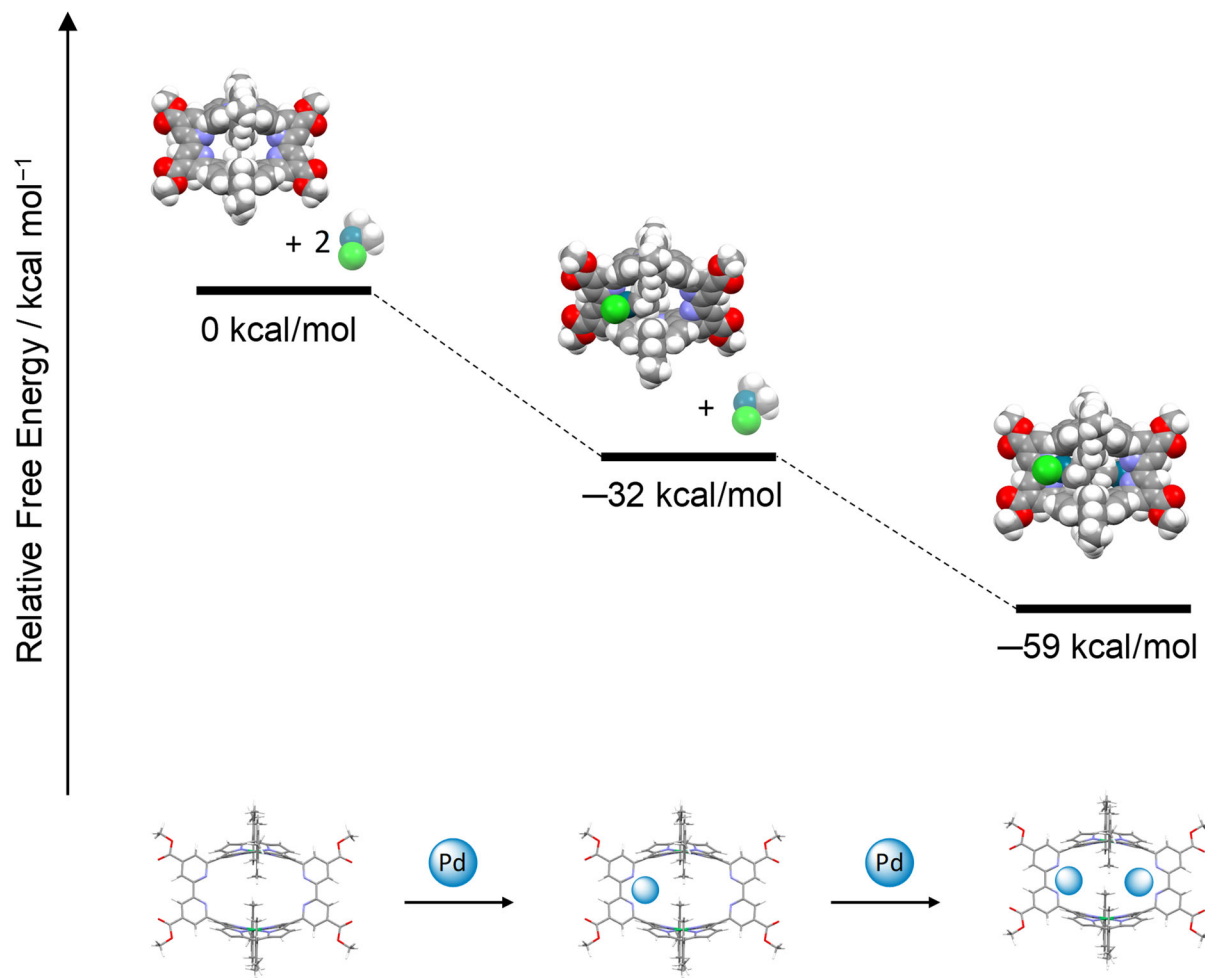

**Figure S8.** Relative Gibbs free energy profiles of **2<sup>Me</sup>** and the  $\eta^3$ -allylpalladium complexes. The structures were optimized at the B3LYP/LANL2DZ (Ni, Pd)/6-31G(d) (H, N, C, O, Cl) level in vacuo.

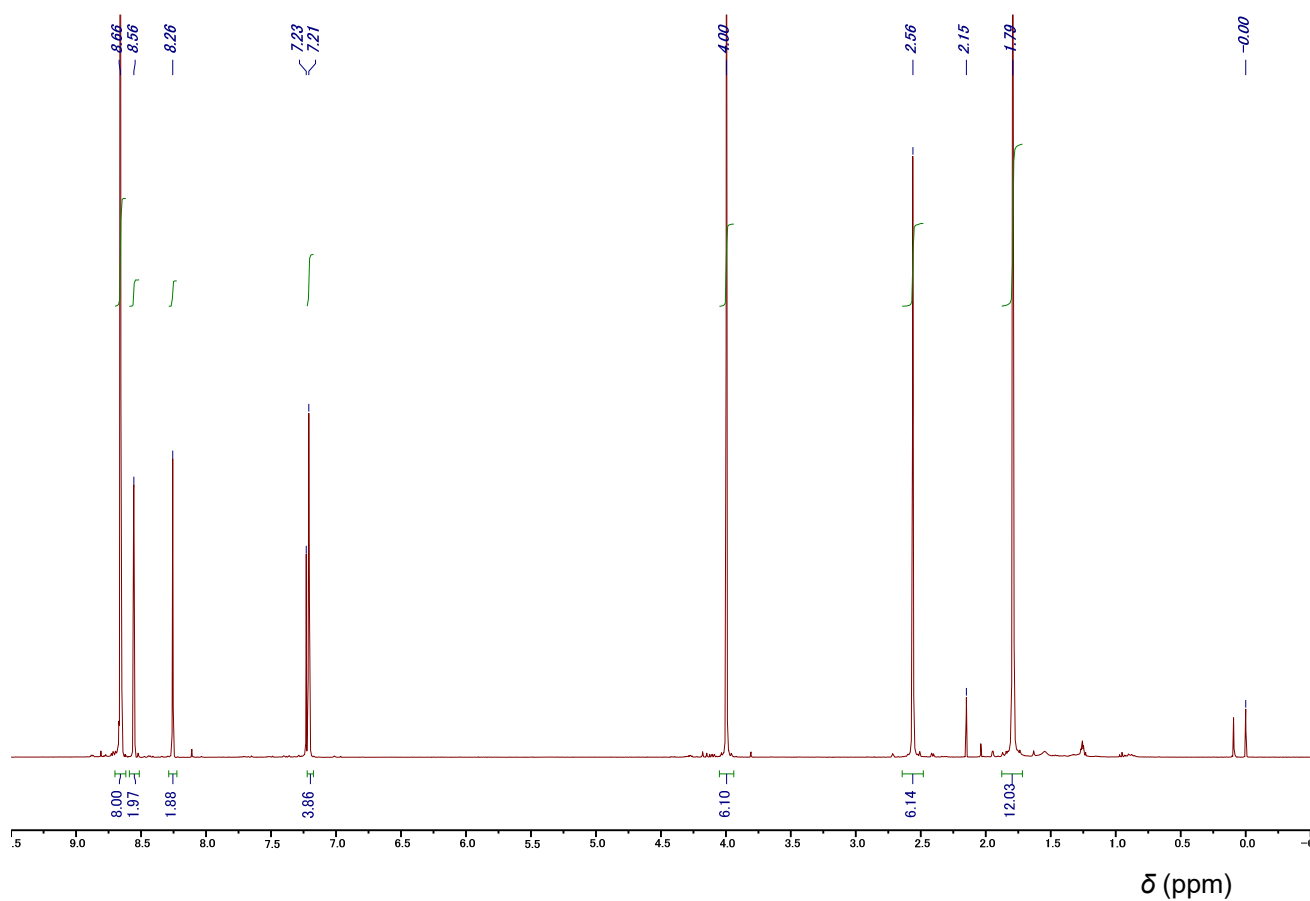

**Figure S9.**  $^1\text{H}$  NMR spectrum (400 MHz,  $\text{CDCl}_3$ ) of **1<sub>Me</sub>**.

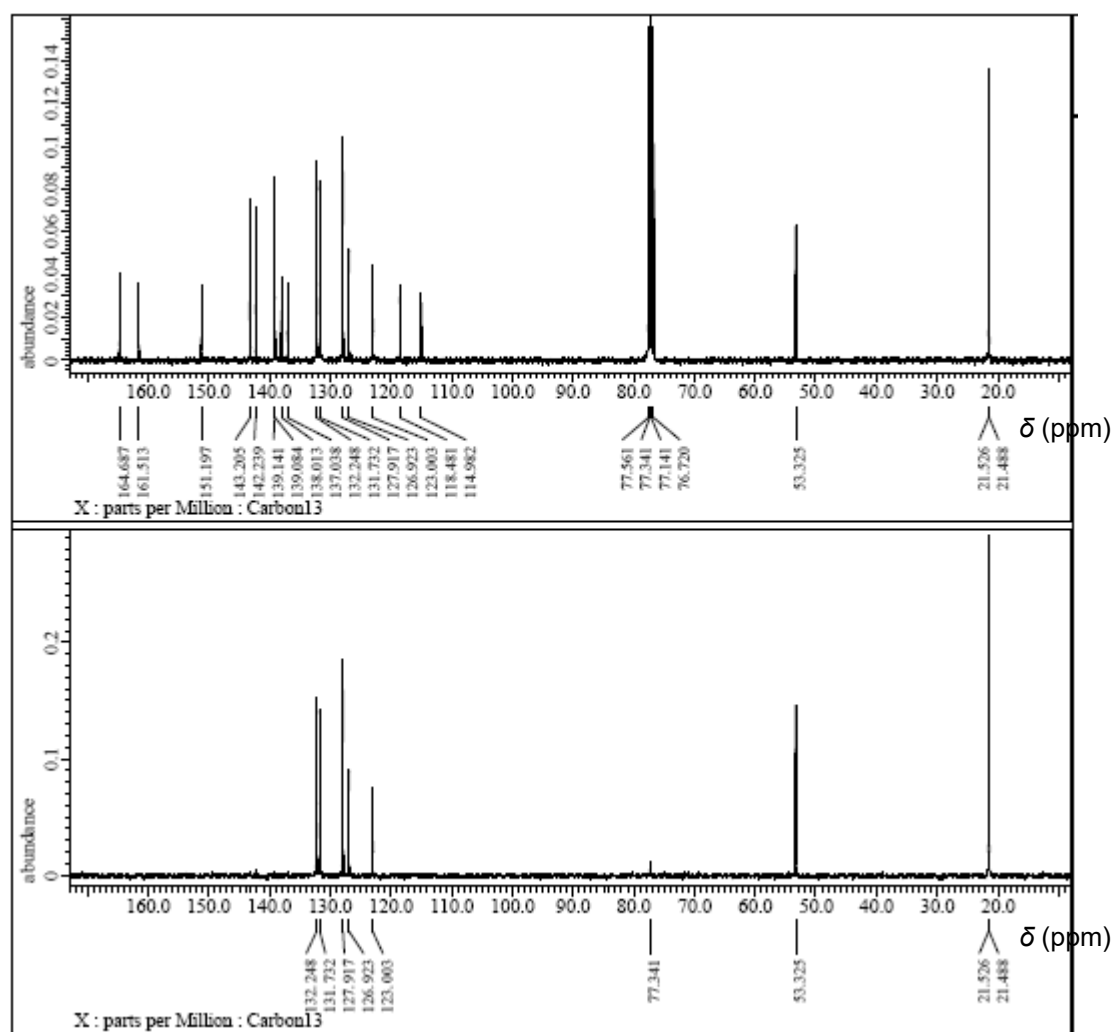

**Figure S10.**  $^{13}\text{C}$  NMR spectrum (upper) and DEPT135 (lower) of  $\mathbf{1}_{\text{Me}}$  (100 MHz,  $\text{CDCl}_3$ ).

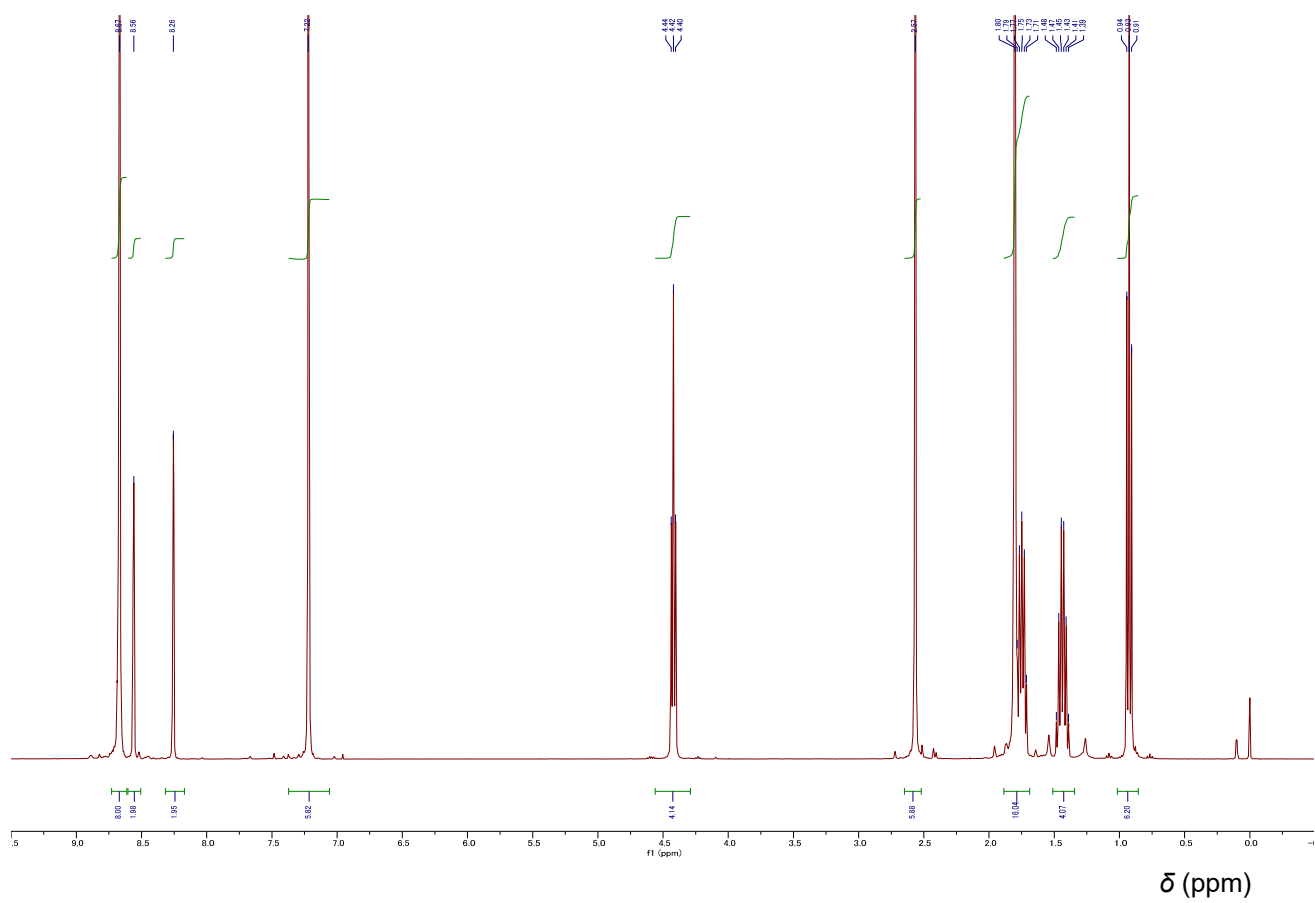

**Figure S11.**  $^1\text{H}$  NMR spectrum (400 MHz,  $\text{CDCl}_3$ ) of **1<sub>Bu</sub>**.

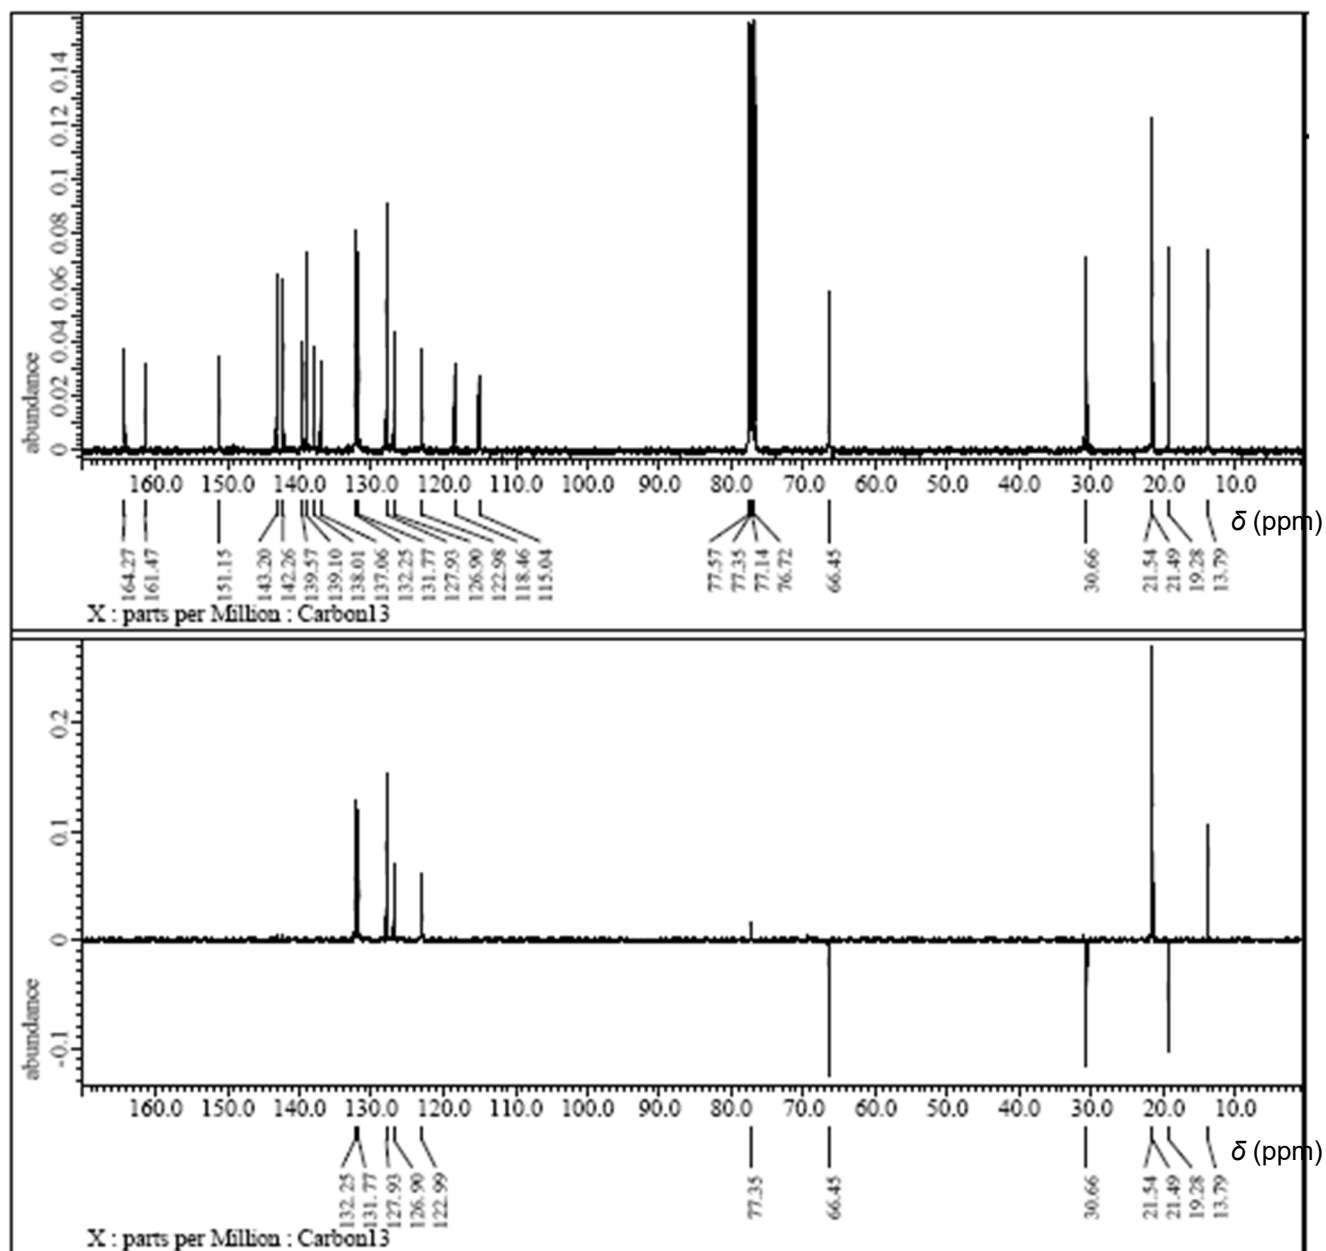

Figure S12. (upper)  $^{13}\text{C}$  NMR (100 MHz,  $\text{CDCl}_3$ ) of **1Bu**. (lower) DEPT135.

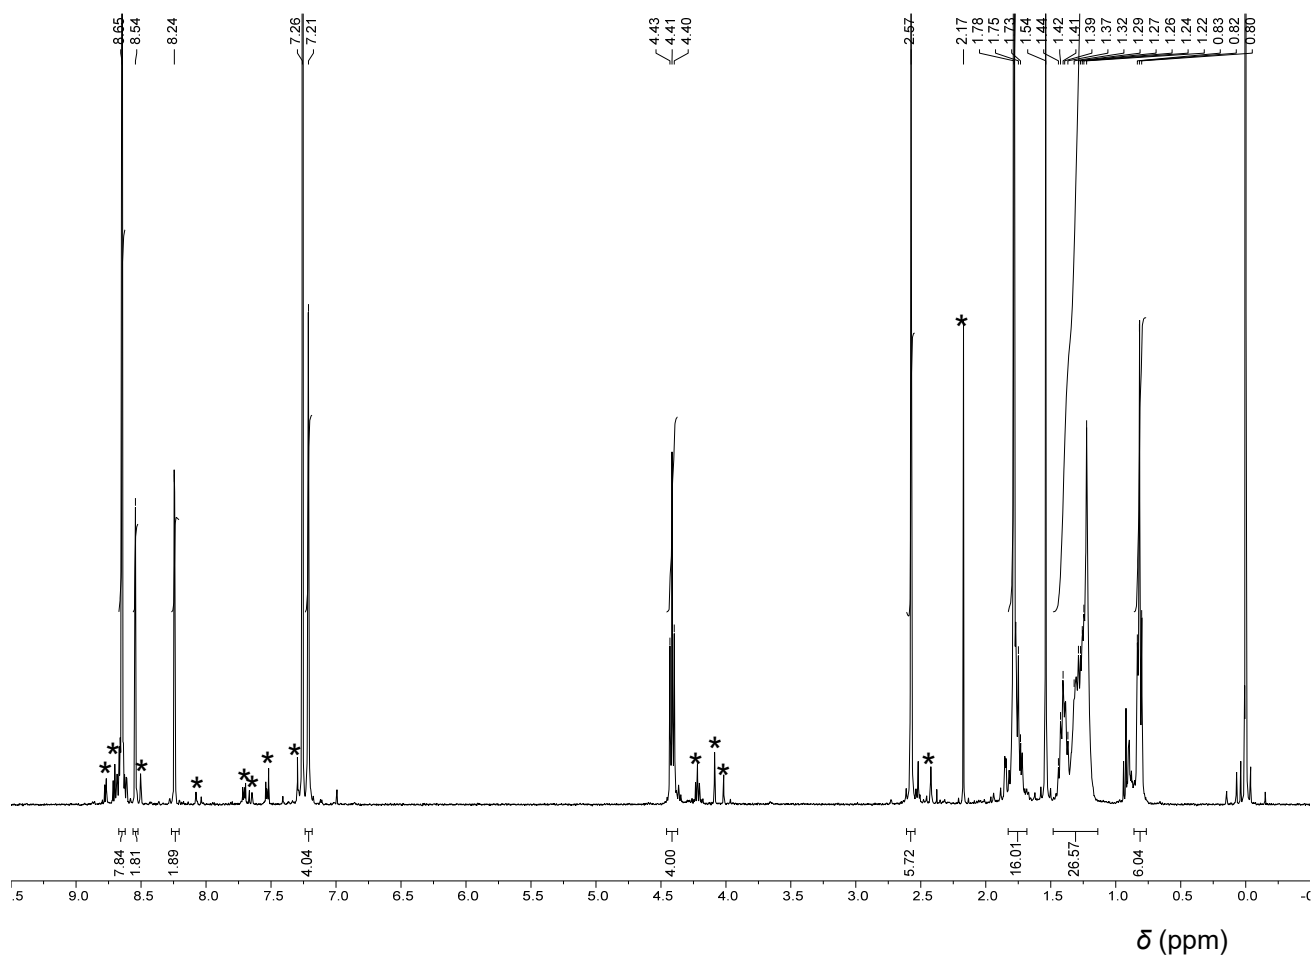

Figure S13.  $^1\text{H}$  NMR (500 MHz,  $\text{CDCl}_3$ ) of **1Oc**. The peaks marked as (\*) indicate impurities which can be removed after the homo coupling reaction.

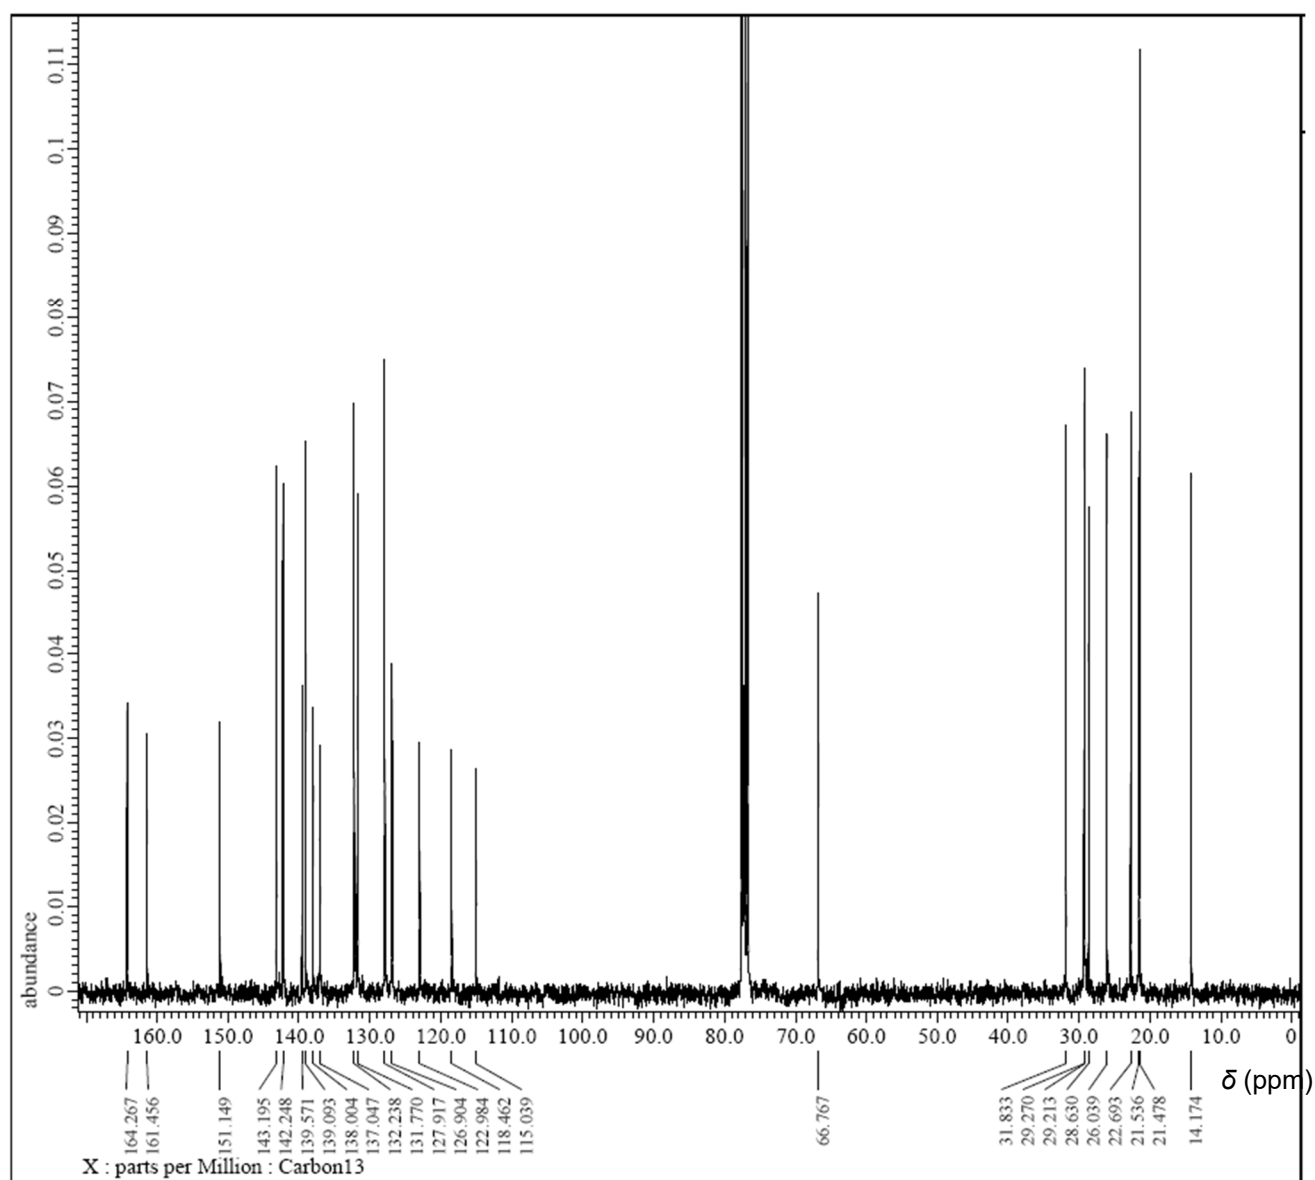

Figure S14. <sup>13</sup>C NMR (125 MHz, CDCl<sub>3</sub>) of **1Oc**.





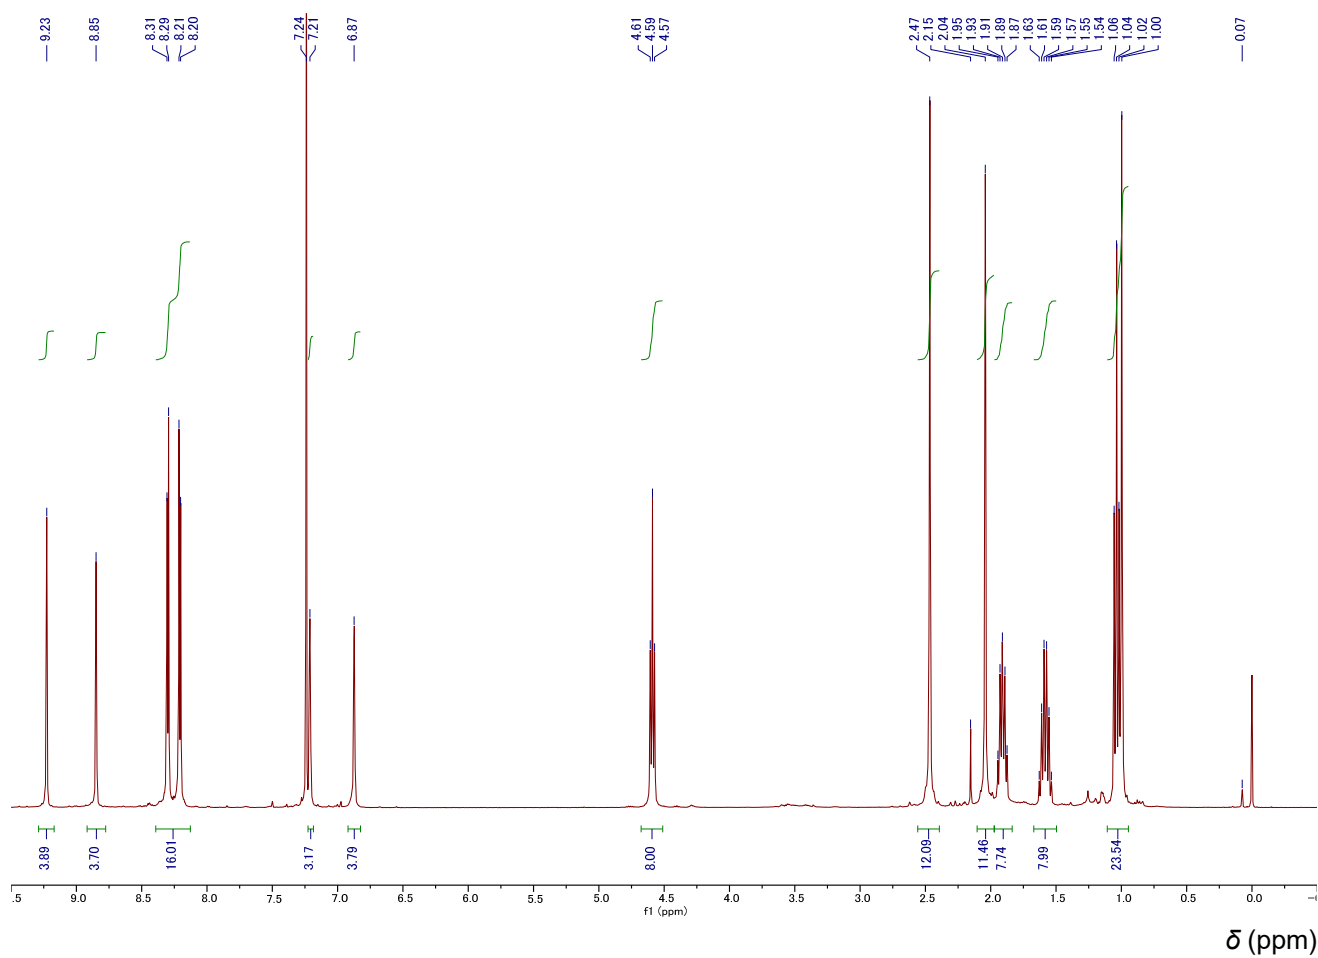

**Figure S16.** <sup>1</sup>H NMR (400 MHz, CDCl<sub>3</sub>) of **2**<sub>Bu</sub>.

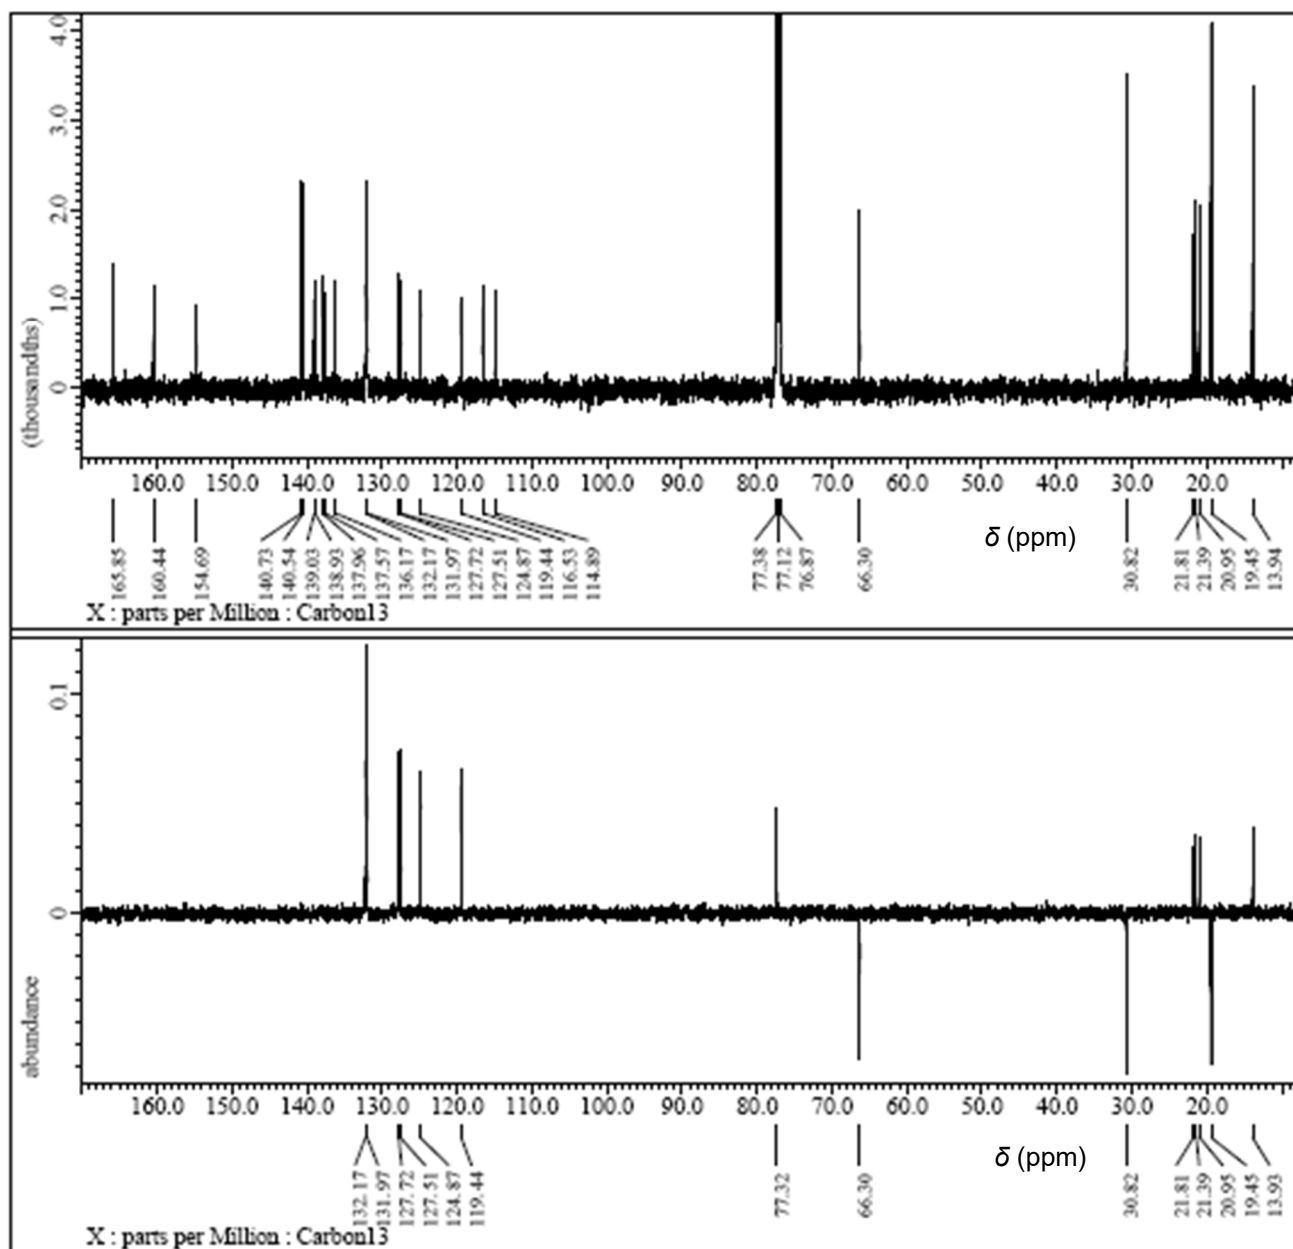

**Figure S17.** (upper)  $^{13}\text{C}$  NMR (100 MHz,  $\text{CDCl}_3$ ) of **2Bu**. (lower) DEPT135.

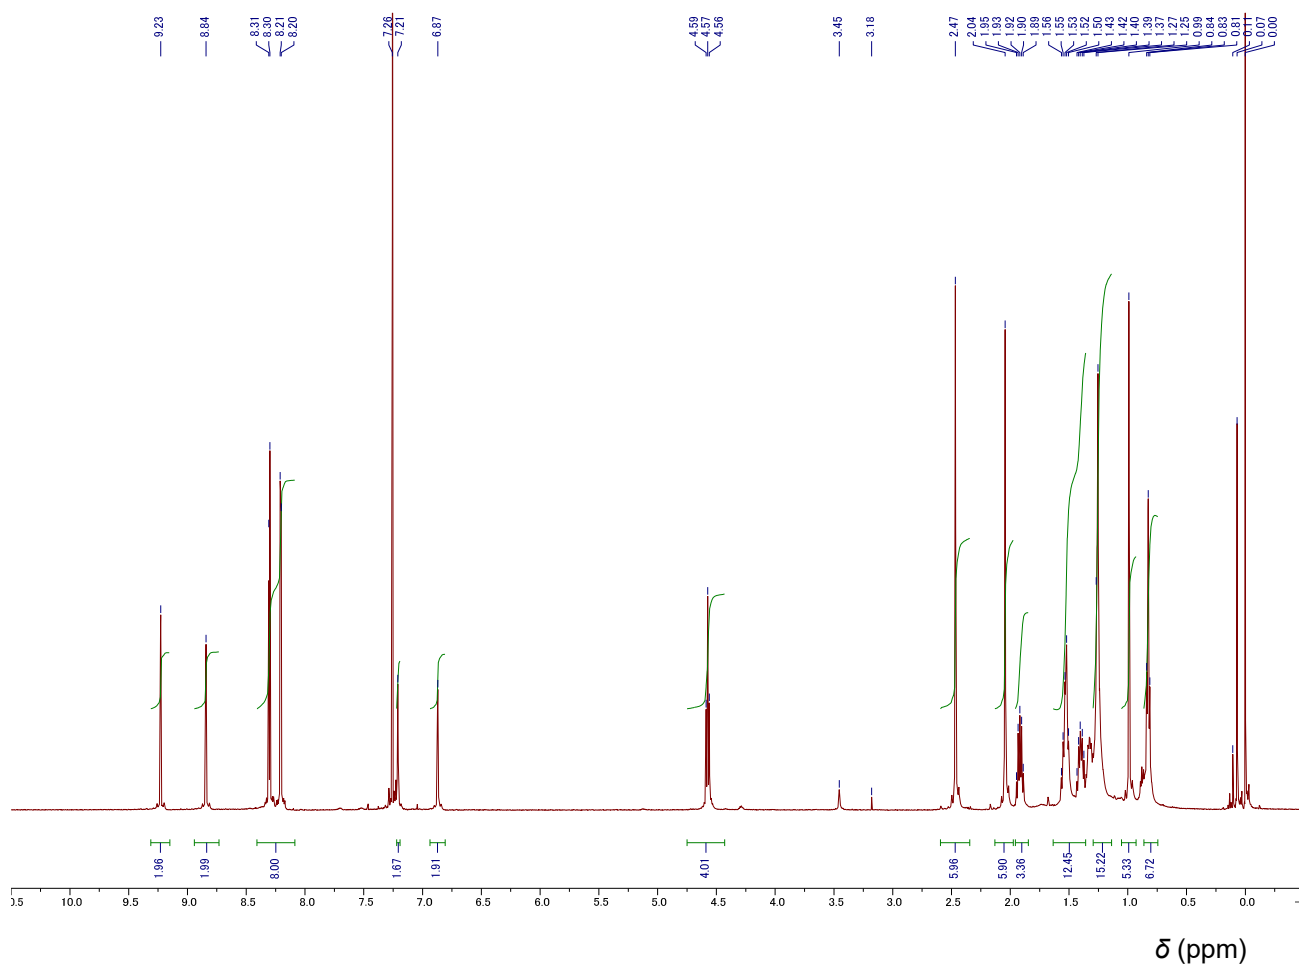

**Figure S18.** <sup>1</sup>H NMR (500 MHz, CDCl<sub>3</sub>) of **2Oc**.

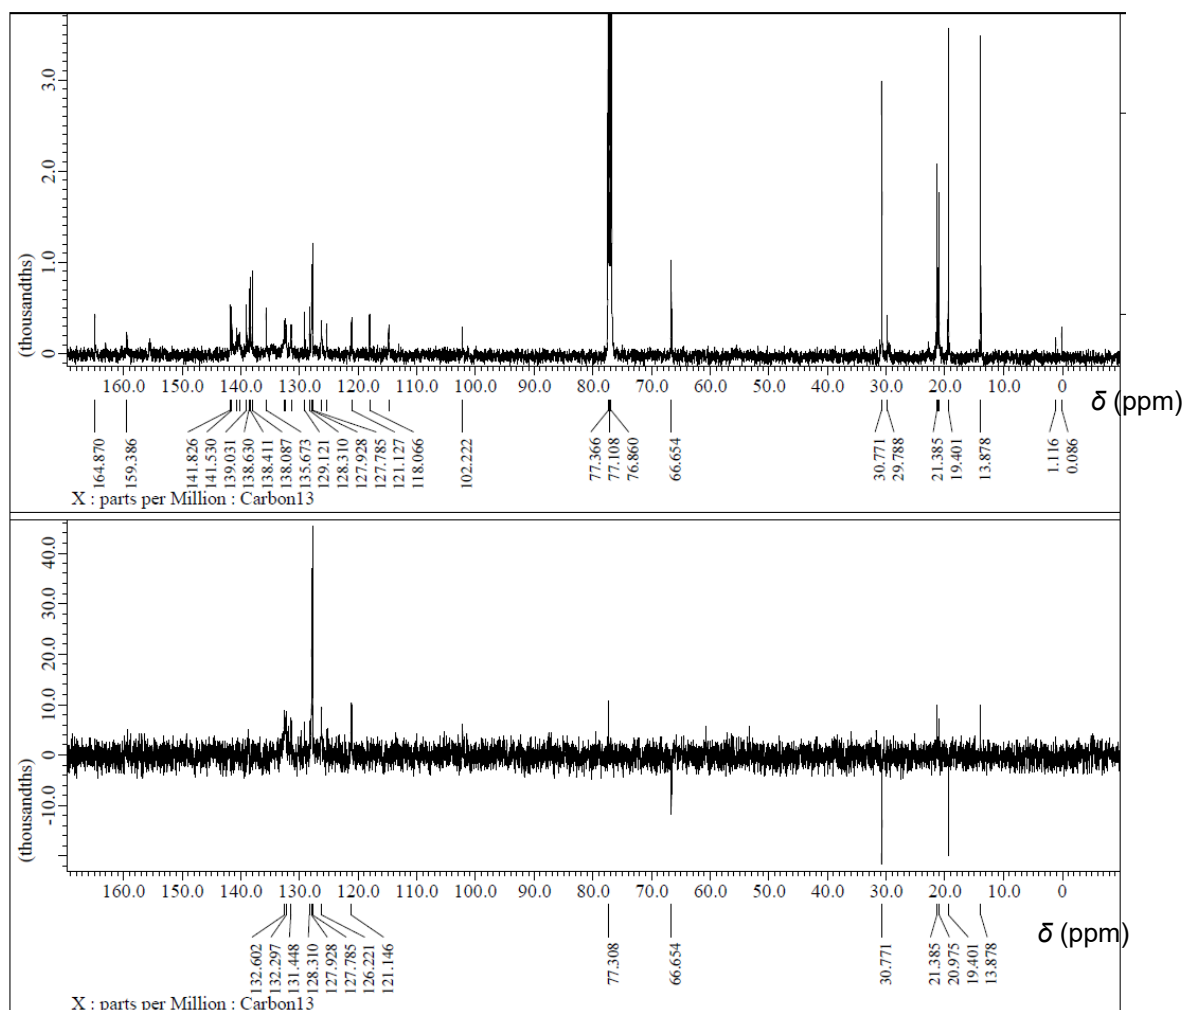

**Figure S19.** (upper)  $^{13}\text{C}$  NMR (125 MHz,  $\text{CDCl}_3$ ) of  $2\text{Bu}-(\text{allylPd})_2$  at 23 °C. (lower) DEPT135.

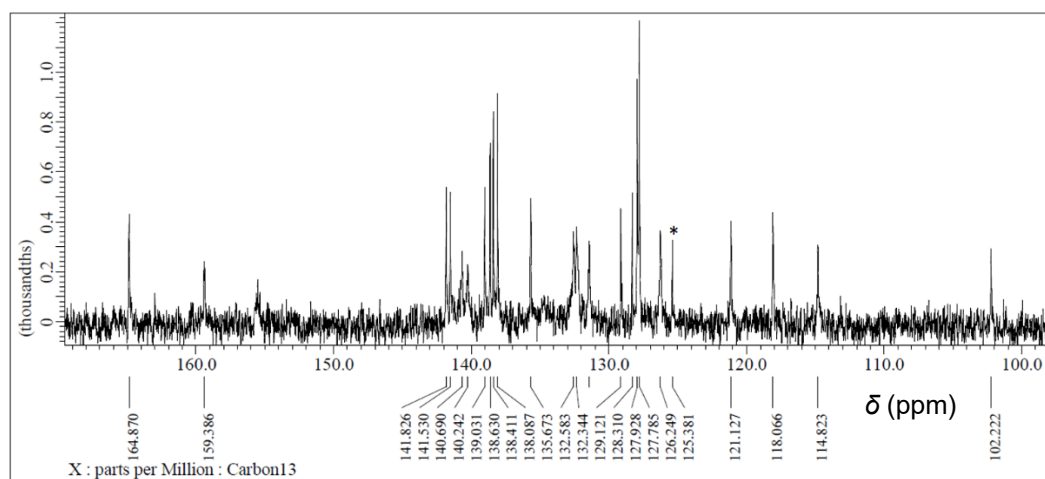

**Figure S20.**  $^{13}\text{C}$  NMR (125 MHz,  $\text{CDCl}_3$ ) of  $2\text{Bu}-(\text{allylPd})_2$  at 23 °C. (same as **Figure S19** (upper) expanded).

\*: impurity.

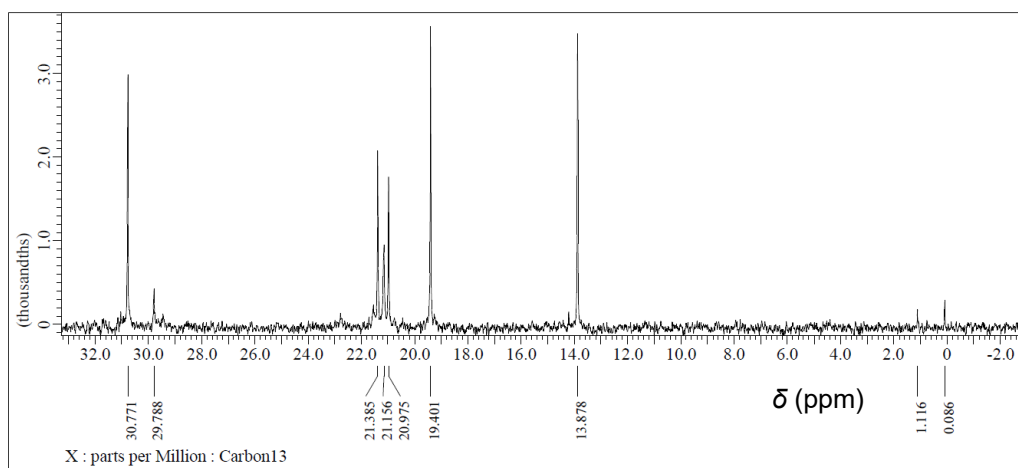

Figure S20. continued.

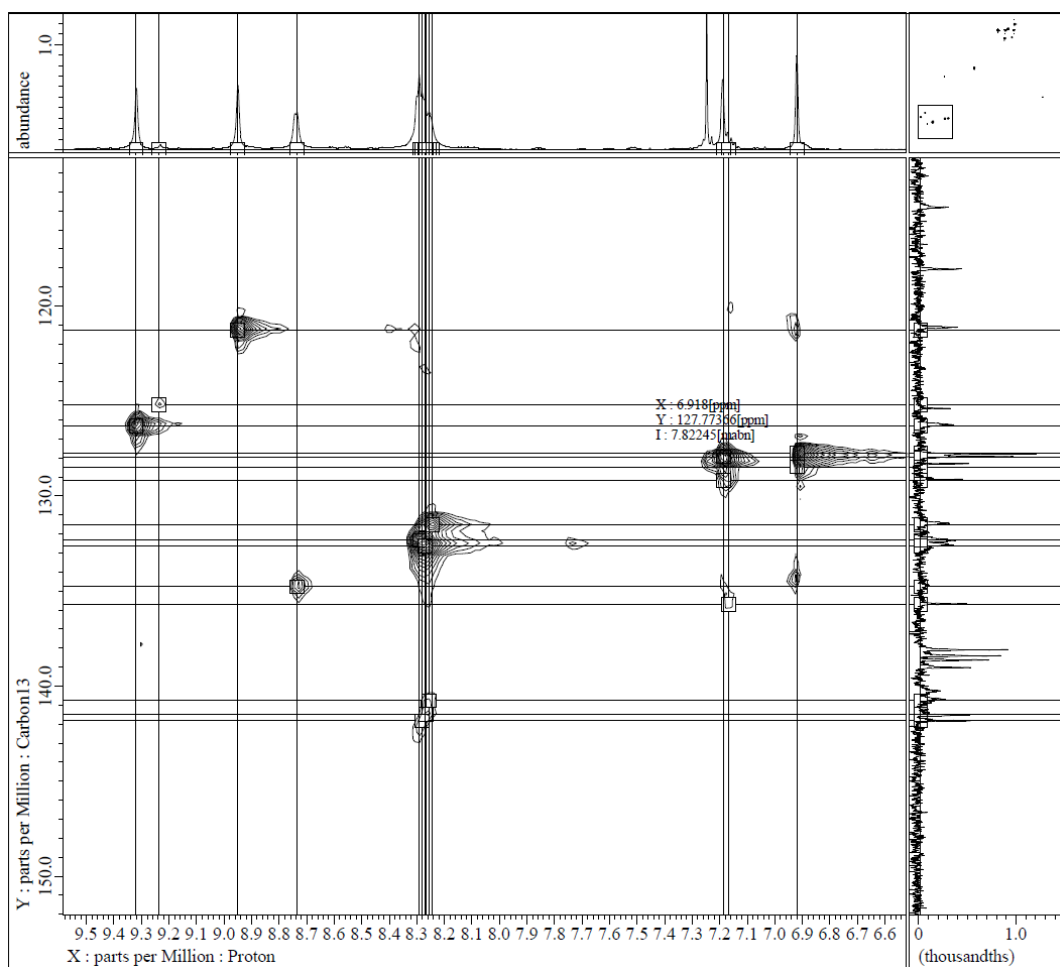

Figure S21. HSQC spectrum of **2**<sub>Bu</sub>-(allyl)Pd<sub>2</sub> in CDCl<sub>3</sub> at 23 °C.

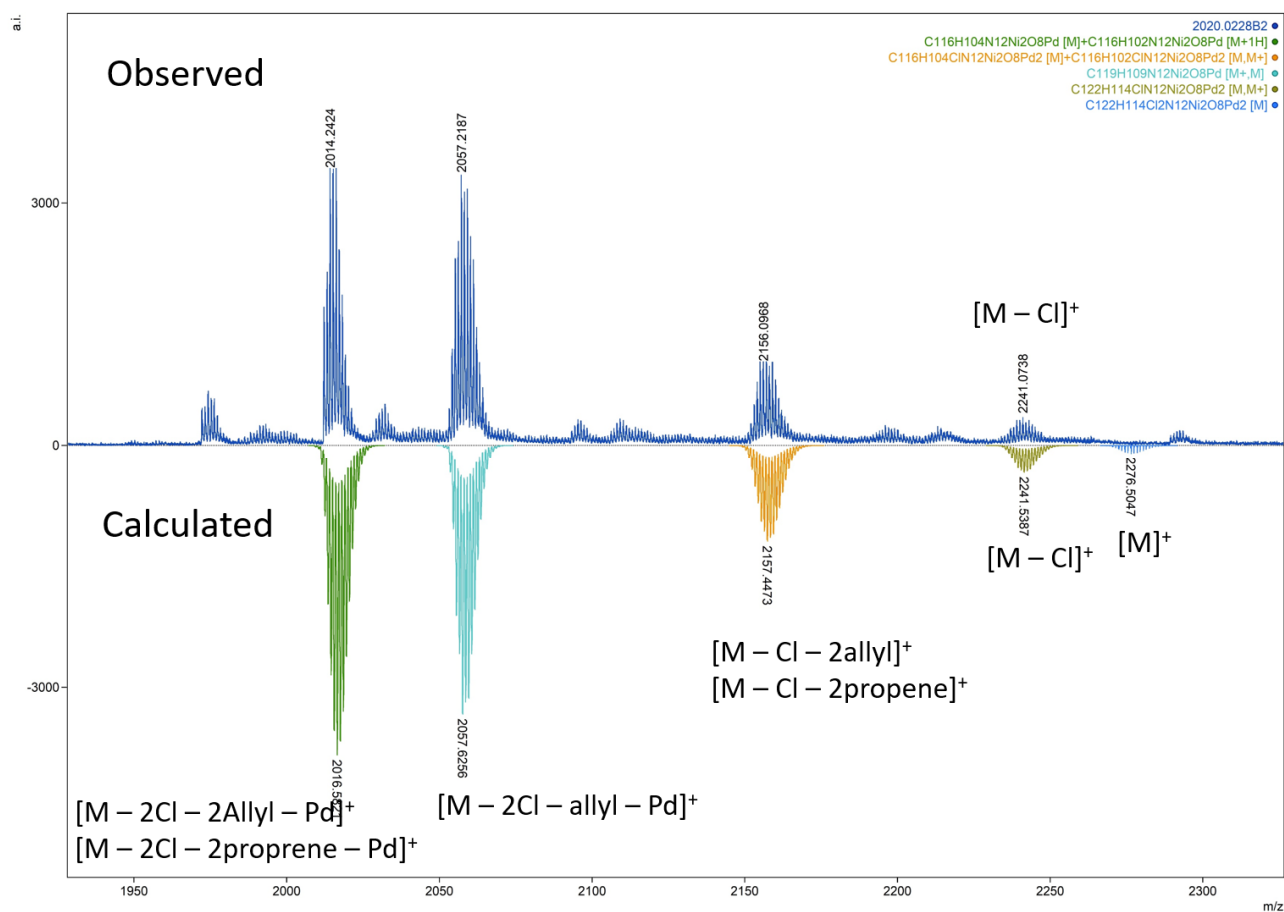

**Figure S22.** ESI-MS spectrum of **2<sub>Bu</sub>-(allylPd)<sub>2</sub>**. (upward) observed. (downward) calculated.
